# Supplementary material
Source: publisher figshare collection journal article supplement (https://acs.figshare.com/ndownloader/files/5885835)
Supplement: Supplementary file 1 [file 5885835]

# om0210457.cif

data_global

# Synthesis, Molecular Structure and Reactivity of Iridium(I) 
# and Iridium(III) Complexes formed by Coordination and C-H
# Activation of the Substituted Arenes C6H5CH2CH2PiPr2 and
# C6H5OCH2CH2PtBu2

# by G. Canepa, E. Sola, M. Martin, F.J. Lahoz, L.A. Oro
# and H. Werner
# 
# To be submitted to Organometallics
# Manuscript number OM0210457
#  -----------------------------------------------------------
#
# Person for contact
_publ_contact_author_name  'Dr. Fernando J. Lahoz'
_publ_contact_author_address
;
  Dr. Fernando J. Lahoz
  Departamento de Qu\'imica Inorg\'anica - I.C.M.A.
  Facultad de Ciencias
  Universidad de Zaragoza - C.S.I.C.
  50009 Zaragoza, Spain
;
_publ_contact_author_phone   '+34 976 761147'
_publ_contact_author_fax     '+34 976 761187'
_publ_contact_author_email        lahoz@posta.unizar.es
# ------------------------------------------------------------
# Publication details
loop_
  _publ_author_name
   'Canepa,G.'
   'Lahoz,F.J.'
   'Martin,M'
   'Oro,L.A.'
   'Sola,E.'
   'Werner,H.'

 _publ_requested_journal        'test' 
_journal_name_full
;
  Organometallics
;
_journal_volume      '?'
_journal_page_first  '?'
_journal_page_last   '?'
_journal_year        '?'
# ----------------------------------------------------------
# Data for compound 13 (local labelling as EDU27AS)
 
data_compd13
 
_audit_creation_method            SHELXL-97
_chemical_name_systematic       ?

_chemical_formula_moiety    'C28 H35 Ir P, B F4'
_chemical_formula_sum       'C28 H35 B F4 Ir P'
_chemical_formula_weight          681.54
 
loop_
 _atom_type_symbol
 _atom_type_description
 _atom_type_scat_dispersion_real
 _atom_type_scat_dispersion_imag
 _atom_type_scat_source
 'C'  'C'   0.0033   0.0016
 'International Tables Vol C Tables 4.2.6.8 and 6.1.1.4'
 'H'  'H'   0.0000   0.0000
 'International Tables Vol C Tables 4.2.6.8 and 6.1.1.4'
 'B'  'B'   0.0013   0.0007
 'International Tables Vol C Tables 4.2.6.8 and 6.1.1.4'
 'F'  'F'   0.0171   0.0103
 'International Tables Vol C Tables 4.2.6.8 and 6.1.1.4'
 'P'  'P'   0.1023   0.0942
 'International Tables Vol C Tables 4.2.6.8 and 6.1.1.4'
 'Ir'  'Ir'  -1.4442   7.9887
 'International Tables Vol C Tables 4.2.6.8 and 6.1.1.4'
 
_symmetry_cell_setting            monoclinic
_symmetry_space_group_name_H-M    P2(1)/c
_symmetry_space_group_name_Hall   '-P 2ybc'
 
loop_
 _symmetry_equiv_pos_as_xyz
 'x, y, z'
 '-x, y+1/2, -z+1/2'
 '-x, -y, -z'
 'x, -y-1/2, z-1/2'
 
_cell_length_a                    8.4249(5)
_cell_length_b                    19.1858(11)
_cell_length_c                    15.9442(9)
_cell_angle_alpha                 90.00
_cell_angle_beta                  93.0220(10)
_cell_angle_gamma                 90.00
_cell_volume                      2573.6(3)
_cell_formula_units_Z             4
_cell_measurement_temperature     100(2)
_cell_measurement_reflns_used     6655
_cell_measurement_theta_min       2.42
_cell_measurement_theta_max       28.20
 
_exptl_crystal_description        'irregular block'
_exptl_crystal_colour             yellow
_exptl_crystal_size_max           0.28
_exptl_crystal_size_mid           0.27
_exptl_crystal_size_min           0.17
_exptl_crystal_density_diffrn     1.759
_exptl_crystal_density_method     'not measured'
_exptl_crystal_F_000              1344
_exptl_absorpt_coefficient_mu     5.295
_exptl_absorpt_correction_type    multi-scan
_exptl_absorpt_correction_T_min   0.265
_exptl_absorpt_correction_T_max   0.407

_exptl_absorpt_process_details    
; SADABS: Area-Detector Absorption Correction. (1996)  Bruker-AXS 
  within SAINT+ package, v. 6.01.
;  
_diffrn_ambient_temperature       100(2)
_diffrn_radiation_wavelength      0.71073
_diffrn_radiation_type            MoK\a
_diffrn_radiation_source          'fine-focus sealed tube'
_diffrn_radiation_monochromator   graphite
_diffrn_measurement_device_type   'Bruker SMART APEX CCD system' 
_diffrn_measurement_method        '\w rotations with narrow frames' 
_diffrn_detector_area_resol_mean  8.26
_diffrn_standards_decay_%         'no decay' 
_diffrn_reflns_number             16658
_diffrn_reflns_av_R_equivalents   0.0294
_diffrn_reflns_av_sigmaI/netI     0.0372
_diffrn_reflns_limit_h_min        -11
_diffrn_reflns_limit_h_max        11
_diffrn_reflns_limit_k_min        -25
_diffrn_reflns_limit_k_max        23
_diffrn_reflns_limit_l_min        -21
_diffrn_reflns_limit_l_max        17
_diffrn_reflns_theta_min          1.66
_diffrn_reflns_theta_max          28.45
_reflns_number_total              5976
_reflns_number_gt                 5348
_reflns_threshold_expression      >2sigma(I)
 
_computing_data_collection       'SMART v. 5.611 (Bruker AXS, 2000)'
_computing_cell_refinement       'SAINT+ v. 6.01 (Bruker AXS, 2000)' 
_computing_data_reduction        'SAINT+ v. 6.01 (Bruker AXS, 2000)' 
_computing_structure_solution    'SHELXS-97 (Sheldrick, 1990)' 
_computing_structure_refinement  'SHELXL-97 (Sheldrick, 1997)' 
_computing_molecular_graphics  'XP program, SHELXTL v6.10,Bruker2000'
_computing_publication_material 'XCIF program, SHELXTLv6.10,BrukerAXS' 
 
_refine_special_details
;
 Refinement of F^2^ against ALL reflections.  The weighted R-factor wR and
 goodness of fit S are based on F^2^, conventional R-factors R are based
 on F, with F set to zero for negative F^2^. The threshold expression of
 F^2^ > 2sigma(F^2^) is used only for calculating R-factors(gt) etc. and is
 not relevant to the choice of reflections for refinement.  R-factors based
 on F^2^ are statistically about twice as large as those based on F, and R-
 factors based on ALL data will be even larger.

 A disordered model has been included for the tetrafluoroborate anion (BF4).
 Two disordered anions sharing the central boron atom with complementary 
 occupancies (0.476 and 0.524(10)) have been used. All hydrogens have been
 included in the refinement from observed positions and have been refined
 with free positional and thermal parameters.
 
 The highest residual peak of 1.20 e/\%A^3^ was found close to the Ir atom
 and the deepest hole -0.87 e/\%A^3^ in the proximity of BF4 anion. None
 have any chemical sense.
;
_refine_ls_structure_factor_coef  Fsqd
_refine_ls_matrix_type            full
_refine_ls_weighting_scheme       calc
_refine_ls_weighting_details
 'calc w=1/[\s^2^(Fo^2^)+(0.0190P)^2^+3.9285P] where P=(Fo^2^+2Fc^2^)/3'
_atom_sites_solution_primary      direct
_atom_sites_solution_secondary    difmap
_atom_sites_solution_hydrogens    geom
_refine_ls_hydrogen_treatment     mixed
_refine_ls_extinction_method      none 
_refine_ls_number_reflns          5976
_refine_ls_number_parameters      454
_refine_ls_number_restraints      0
_refine_ls_R_factor_all           0.0305
_refine_ls_R_factor_gt            0.0255
_refine_ls_wR_factor_ref          0.0554
_refine_ls_wR_factor_gt           0.0537
_refine_ls_goodness_of_fit_ref    1.028
_refine_ls_restrained_S_all       1.028
_refine_ls_shift/su_max           0.039
_refine_ls_shift/su_mean          0.008
  
loop_ 
 _atom_site_label 
 _atom_site_type_symbol 
 _atom_site_fract_x 
 _atom_site_fract_y 
 _atom_site_fract_z 
 _atom_site_U_iso_or_equiv 
 _atom_site_adp_type 
 _atom_site_occupancy 
 _atom_site_symmetry_multiplicity 
 _atom_site_calc_flag 
 _atom_site_refinement_flags 
 _atom_site_disorder_assembly 
 _atom_site_disorder_group 
Ir1 Ir 0.054854(14) 0.636899(6) 0.644326(7) 0.00979(5) Uani 1 1 d . . . 
P1 P 0.18103(10) 0.73328(4) 0.60097(5) 0.01073(17) Uani 1 1 d . . . 
C1 C 0.2107(4) 0.71686(19) 0.4885(2) 0.0155(7) Uani 1 1 d . . . 
H1A H 0.305(4) 0.6965(18) 0.489(2) 0.009(9) Uiso 1 1 d . . . 
H1B H 0.217(4) 0.7624(19) 0.459(2) 0.013(9) Uiso 1 1 d . . . 
C2 C 0.0814(4) 0.6695(2) 0.4471(2) 0.0181(7) Uani 1 1 d . . . 
H2A H -0.013(5) 0.698(2) 0.430(2) 0.024(10) Uiso 1 1 d . . . 
H2B H 0.119(6) 0.650(2) 0.398(3) 0.042(14) Uiso 1 1 d . . . 
C3 C 0.0283(4) 0.61495(18) 0.5078(2) 0.0145(7) Uani 1 1 d . . . 
C4 C 0.1404(4) 0.56471(18) 0.5411(2) 0.0152(7) Uani 1 1 d . . . 
H4 H 0.232(4) 0.5660(18) 0.521(2) 0.008(9) Uiso 1 1 d . . . 
C5 C 0.0984(4) 0.52097(18) 0.6065(2) 0.0173(7) Uani 1 1 d . . . 
H5 H 0.177(4) 0.4894(19) 0.630(2) 0.013(9) Uiso 1 1 d . . . 
C6 C -0.0554(4) 0.52575(19) 0.6386(2) 0.0193(8) Uani 1 1 d . . . 
H6 H -0.084(4) 0.4983(19) 0.685(2) 0.013(9) Uiso 1 1 d . . . 
C7 C -0.1696(4) 0.57136(18) 0.6018(2) 0.0179(7) Uani 1 1 d . . . 
H7 H -0.272(5) 0.576(2) 0.621(2) 0.029(11) Uiso 1 1 d . . . 
C8 C -0.1301(4) 0.61549(19) 0.5353(2) 0.0161(7) Uani 1 1 d . . . 
H8 H -0.205(5) 0.647(2) 0.511(3) 0.024(11) Uiso 1 1 d . . . 
C9 C 0.0768(4) 0.81827(18) 0.5991(2) 0.0158(7) Uani 1 1 d . . . 
H9 H 0.137(5) 0.841(2) 0.562(2) 0.019(10) Uiso 1 1 d . . . 
C10 C -0.0927(5) 0.8089(2) 0.5630(3) 0.0262(9) Uani 1 1 d . . . 
H10A H -0.099(4) 0.788(2) 0.506(2) 0.022(10) Uiso 1 1 d . . . 
H10B H -0.150(6) 0.850(3) 0.559(3) 0.042(14) Uiso 1 1 d . . . 
H10C H -0.145(5) 0.782(2) 0.594(2) 0.017(10) Uiso 1 1 d . . . 
C11 C 0.0818(6) 0.8595(2) 0.6813(3) 0.0246(8) Uani 1 1 d . . . 
H11A H 0.013(5) 0.841(2) 0.722(3) 0.035(12) Uiso 1 1 d . . . 
H11B H 0.052(4) 0.907(2) 0.670(2) 0.026(11) Uiso 1 1 d . . . 
H11C H 0.183(6) 0.862(2) 0.706(3) 0.040(14) Uiso 1 1 d . . . 
C12 C 0.3825(4) 0.75049(18) 0.6473(2) 0.0146(7) Uani 1 1 d . . . 
H12 H 0.369(4) 0.7623(18) 0.707(2) 0.014(9) Uiso 1 1 d . . . 
C13 C 0.4633(5) 0.8118(2) 0.6056(3) 0.0261(9) Uani 1 1 d . . . 
H13A H 0.399(5) 0.856(2) 0.606(3) 0.033(12) Uiso 1 1 d . . . 
H13B H 0.569(4) 0.821(2) 0.634(2) 0.020(10) Uiso 1 1 d . . . 
H13C H 0.483(5) 0.801(2) 0.551(3) 0.029(12) Uiso 1 1 d . . . 
C14 C 0.4864(4) 0.6846(2) 0.6446(2) 0.0177(7) Uani 1 1 d . . . 
H14A H 0.594(5) 0.698(2) 0.674(2) 0.025(10) Uiso 1 1 d . . . 
H14B H 0.500(4) 0.6724(19) 0.590(2) 0.013(9) Uiso 1 1 d . . . 
H14C H 0.443(5) 0.648(2) 0.671(2) 0.016(10) Uiso 1 1 d . . . 
C15 C 0.0022(4) 0.68581(18) 0.7601(2) 0.0133(7) Uani 1 1 d . . . 
H15 H 0.016(4) 0.7345(19) 0.757(2) 0.010(9) Uiso 1 1 d . . . 
C16 C 0.1512(4) 0.64774(17) 0.7690(2) 0.0120(6) Uani 1 1 d . . . 
H16 H 0.244(4) 0.6783(18) 0.769(2) 0.010(9) Uiso 1 1 d . . . 
C17 C -0.1490(4) 0.66952(19) 0.7994(2) 0.0151(7) Uani 1 1 d . . . 
C18 C -0.2448(4) 0.7255(2) 0.8223(2) 0.0188(7) Uani 1 1 d . . . 
H18 H -0.212(5) 0.771(2) 0.811(2) 0.030(12) Uiso 1 1 d . . . 
C19 C -0.3864(4) 0.7135(2) 0.8621(2) 0.0230(8) Uani 1 1 d . . . 
H19 H -0.445(5) 0.749(2) 0.873(3) 0.041(14) Uiso 1 1 d . . . 
C20 C -0.4337(5) 0.6464(2) 0.8784(2) 0.0267(9) Uani 1 1 d . . . 
H20 H -0.520(5) 0.636(2) 0.902(3) 0.023(11) Uiso 1 1 d . . . 
C21 C -0.3408(4) 0.5908(2) 0.8554(2) 0.0235(8) Uani 1 1 d . . . 
H21 H -0.372(4) 0.5451(18) 0.8609(19) 0.000(8) Uiso 1 1 d . . . 
C22 C -0.2007(4) 0.6020(2) 0.8160(2) 0.0198(8) Uani 1 1 d . . . 
H22 H -0.134(4) 0.5607(19) 0.803(2) 0.017(10) Uiso 1 1 d . . . 
C23 C 0.1851(4) 0.58519(18) 0.8230(2) 0.0138(7) Uani 1 1 d . . . 
C24 C 0.1368(4) 0.58223(19) 0.9057(2) 0.0174(7) Uani 1 1 d . . . 
H24 H 0.071(5) 0.621(2) 0.924(2) 0.017(10) Uiso 1 1 d . . . 
C25 C 0.1906(4) 0.5297(2) 0.9602(2) 0.0209(8) Uani 1 1 d . . . 
H25 H 0.149(4) 0.5297(18) 1.018(2) 0.011(9) Uiso 1 1 d . . . 
C26 C 0.2927(4) 0.47854(19) 0.9324(2) 0.0222(8) Uani 1 1 d . . . 
H26 H 0.330(4) 0.442(2) 0.968(2) 0.019(10) Uiso 1 1 d . . . 
C27 C 0.3371(4) 0.47984(19) 0.8503(2) 0.0198(8) Uani 1 1 d . . . 
H27 H 0.400(4) 0.4447(17) 0.8310(19) 0.001(8) Uiso 1 1 d . . . 
C28 C 0.2857(4) 0.53298(19) 0.7966(2) 0.0170(7) Uani 1 1 d . . . 
H28 H 0.325(5) 0.534(2) 0.743(3) 0.027(11) Uiso 1 1 d . . . 
B1 B 0.4929(6) 0.4126(3) 0.6339(3) 0.0306(11) Uani 1 1 d . . . 
F1A F 0.3377(7) 0.3936(3) 0.6530(4) 0.0238(15) Uiso 0.524(10) 1 d P . . 
F1B F 0.3600(9) 0.3940(4) 0.6722(5) 0.033(2) Uiso 0.476(10) 1 d P . . 
F2A F 0.4857(6) 0.4898(3) 0.6275(3) 0.0319(16) Uiso 0.524(10) 1 d P . . 
F2B F 0.5389(8) 0.4748(3) 0.6590(5) 0.044(2) Uiso 0.476(10) 1 d P . . 
F3A F 0.5136(8) 0.4027(4) 0.5490(4) 0.0344(18) Uiso 0.524(10) 1 d P . . 
F3B F 0.4917(9) 0.3859(4) 0.5522(4) 0.0310(19) Uiso 0.476(10) 1 d P . . 
F4A F 0.6214(8) 0.3977(5) 0.6804(4) 0.069(2) Uiso 0.524(10) 1 d P . . 
F4B F 0.6014(6) 0.3606(4) 0.6767(3) 0.0302(17) Uiso 0.476(10) 1 d P . . 
 
loop_ 
 _atom_site_aniso_label 
 _atom_site_aniso_U_11 
 _atom_site_aniso_U_22 
 _atom_site_aniso_U_33 
 _atom_site_aniso_U_23 
 _atom_site_aniso_U_13 
 _atom_site_aniso_U_12 
Ir1 0.01005(7) 0.00913(7) 0.01005(7) -0.00179(5) -0.00083(4) 0.00046(5) 
P1 0.0110(4) 0.0111(4) 0.0100(4) -0.0004(3) -0.0002(3) 0.0013(3) 
C1 0.0164(18) 0.0179(19) 0.0121(16) -0.0005(14) 0.0003(13) 0.0007(14) 
C2 0.0205(19) 0.022(2) 0.0116(17) -0.0017(14) -0.0030(14) 0.0012(15) 
C3 0.0185(17) 0.0124(17) 0.0120(16) -0.0071(13) -0.0043(13) -0.0016(13) 
C4 0.0129(17) 0.0165(18) 0.0160(17) -0.0096(13) -0.0001(13) 0.0004(13) 
C5 0.0218(18) 0.0112(17) 0.0185(18) -0.0076(14) -0.0025(14) 0.0023(14) 
C6 0.0252(19) 0.0139(18) 0.0185(18) -0.0046(14) -0.0013(14) -0.0052(15) 
C7 0.0150(18) 0.0169(19) 0.0217(18) -0.0072(14) -0.0001(14) -0.0040(14) 
C8 0.0158(17) 0.0160(18) 0.0159(17) -0.0072(14) -0.0052(13) -0.0012(14) 
C9 0.0186(18) 0.0114(17) 0.0176(17) 0.0019(14) 0.0030(13) 0.0023(13) 
C10 0.020(2) 0.020(2) 0.039(2) -0.0002(19) -0.0045(17) 0.0061(17) 
C11 0.041(3) 0.012(2) 0.021(2) -0.0012(15) 0.0041(17) 0.0051(17) 
C12 0.0133(16) 0.0161(18) 0.0144(17) 0.0008(13) 0.0014(13) -0.0032(13) 
C13 0.023(2) 0.025(2) 0.031(2) 0.0030(18) 0.0011(17) -0.0108(17) 
C14 0.0143(17) 0.022(2) 0.0166(18) 0.0002(15) -0.0032(14) 0.0020(15) 
C15 0.0177(17) 0.0093(17) 0.0129(16) -0.0012(13) 0.0003(12) 0.0012(13) 
C16 0.0128(16) 0.0118(17) 0.0113(15) -0.0013(12) 0.0006(12) -0.0017(13) 
C17 0.0136(16) 0.0211(19) 0.0102(16) -0.0006(13) -0.0038(12) 0.0027(14) 
C18 0.0172(18) 0.024(2) 0.0144(17) -0.0058(15) -0.0031(13) 0.0012(15) 
C19 0.0146(18) 0.038(2) 0.0164(18) -0.0082(16) -0.0022(14) 0.0066(16) 
C20 0.0131(18) 0.051(3) 0.0163(18) -0.0045(17) 0.0034(14) -0.0071(18) 
C21 0.0211(19) 0.028(2) 0.0210(19) 0.0024(16) -0.0029(14) -0.0096(17) 
C22 0.0178(18) 0.026(2) 0.0161(17) -0.0013(15) 0.0013(14) -0.0017(15) 
C23 0.0137(16) 0.0140(17) 0.0132(16) -0.0010(13) -0.0032(12) -0.0054(13) 
C24 0.0162(17) 0.0179(19) 0.0178(17) -0.0016(14) -0.0010(13) -0.0030(14) 
C25 0.0240(19) 0.022(2) 0.0170(18) 0.0038(15) -0.0006(14) -0.0081(15) 
C26 0.027(2) 0.0140(19) 0.025(2) 0.0093(15) -0.0092(15) -0.0077(15) 
C27 0.0188(18) 0.0135(18) 0.027(2) -0.0017(15) -0.0049(15) 0.0029(14) 
C28 0.0165(17) 0.0182(19) 0.0159(17) -0.0004(14) -0.0035(13) -0.0015(14) 
B1 0.023(2) 0.042(3) 0.027(2) -0.008(2) 0.0032(18) 0.004(2) 
 
_geom_special_details 
; 
 All esds (except the esd in the dihedral angle between two l.s. planes) 
 are estimated using the full covariance matrix.  The cell esds are taken 
 into account individually in the estimation of esds in distances, angles 
 and torsion angles; correlations between esds in cell parameters are only 
 used when they are defined by crystal symmetry.  An approximate (isotropic) 
 treatment of cell esds is used for estimating esds involving l.s. planes. 
; 
 
loop_ 
 _geom_bond_atom_site_label_1 
 _geom_bond_atom_site_label_2 
 _geom_bond_distance 
 _geom_bond_site_symmetry_2 
 _geom_bond_publ_flag 
Ir1 C16 2.118(3) . ? 
Ir1 C15 2.139(3) . ? 
Ir1 C3 2.216(3) . ? 
Ir1 P1 2.2594(9) . ? 
Ir1 C4 2.296(3) . ? 
Ir1 C8 2.309(3) . ? 
Ir1 C6 2.326(4) . ? 
Ir1 C5 2.339(3) . ? 
Ir1 C7 2.342(3) . ? 
P1 C12 1.845(3) . ? 
P1 C1 1.850(3) . ? 
P1 C9 1.852(3) . ? 
C1 C2 1.540(5) . ? 
C1 H1A 0.89(4) . ? 
C1 H1B 0.99(4) . ? 
C2 C3 1.510(5) . ? 
C2 H2A 1.00(4) . ? 
C2 H2B 0.93(5) . ? 
C3 C8 1.426(5) . ? 
C3 C4 1.432(5) . ? 
C4 C5 1.398(5) . ? 
C4 H4 0.85(4) . ? 
C5 C6 1.421(5) . ? 
C5 H5 0.96(4) . ? 
C6 C7 1.407(5) . ? 
C6 H6 0.94(4) . ? 
C7 C8 1.410(5) . ? 
C7 H7 0.94(4) . ? 
C8 H8 0.94(4) . ? 
C9 C10 1.522(5) . ? 
C9 C11 1.529(5) . ? 
C9 H9 0.91(4) . ? 
C10 H10A 0.99(4) . ? 
C10 H10B 0.92(5) . ? 
C10 H10C 0.86(4) . ? 
C11 H11A 0.96(5) . ? 
C11 H11B 0.96(4) . ? 
C11 H11C 0.92(5) . ? 
C12 C13 1.529(5) . ? 
C12 C14 1.539(5) . ? 
C12 H12 1.00(4) . ? 
C13 H13A 1.00(4) . ? 
C13 H13B 0.99(4) . ? 
C13 H13C 0.92(4) . ? 
C14 H14A 1.03(4) . ? 
C14 H14B 0.92(4) . ? 
C14 H14C 0.90(4) . ? 
C15 C16 1.452(5) . ? 
C15 C17 1.482(5) . ? 
C15 H15 0.94(4) . ? 
C16 C23 1.496(4) . ? 
C16 H16 0.98(4) . ? 
C17 C22 1.396(5) . ? 
C17 C18 1.403(5) . ? 
C18 C19 1.400(5) . ? 
C18 H18 0.94(4) . ? 
C19 C20 1.375(6) . ? 
C19 H19 0.87(4) . ? 
C20 C21 1.385(6) . ? 
C20 H20 0.86(4) . ? 
C21 C22 1.382(5) . ? 
C21 H21 0.92(3) . ? 
C22 H22 1.00(4) . ? 
C23 C28 1.392(5) . ? 
C23 C24 1.401(5) . ? 
C24 C25 1.391(5) . ? 
C24 H24 0.98(4) . ? 
C25 C26 1.393(5) . ? 
C25 H25 1.01(3) . ? 
C26 C27 1.380(5) . ? 
C26 H26 0.94(4) . ? 
C27 C28 1.386(5) . ? 
C27 H27 0.92(3) . ? 
C28 H28 0.93(4) . ? 
B1 F4A 1.311(8) . ? 
B1 F2B 1.312(8) . ? 
B1 F1B 1.351(8) . ? 
B1 F3A 1.387(8) . ? 
B1 F3B 1.398(8) . ? 
B1 F1A 1.407(8) . ? 
B1 F2A 1.485(8) . ? 
B1 F4B 1.494(7) . ? 
 
loop_ 
 _geom_angle_atom_site_label_1 
 _geom_angle_atom_site_label_2 
 _geom_angle_atom_site_label_3 
 _geom_angle 
 _geom_angle_site_symmetry_1 
 _geom_angle_site_symmetry_3 
 _geom_angle_publ_flag 
C16 Ir1 C15 39.90(12) . . ? 
C16 Ir1 C3 162.64(13) . . ? 
C15 Ir1 C3 156.40(13) . . ? 
C16 Ir1 P1 92.50(9) . . ? 
C15 Ir1 P1 91.57(10) . . ? 
C3 Ir1 P1 83.10(9) . . ? 
C16 Ir1 C4 127.80(12) . . ? 
C15 Ir1 C4 166.13(13) . . ? 
C3 Ir1 C4 36.95(12) . . ? 
P1 Ir1 C4 95.97(10) . . ? 
C16 Ir1 C8 159.08(13) . . ? 
C15 Ir1 C8 124.44(13) . . ? 
C3 Ir1 C8 36.67(12) . . ? 
P1 Ir1 C8 103.01(9) . . ? 
C4 Ir1 C8 65.05(12) . . ? 
C16 Ir1 C6 105.01(12) . . ? 
C15 Ir1 C6 109.59(13) . . ? 
C3 Ir1 C6 76.59(13) . . ? 
P1 Ir1 C6 158.73(9) . . ? 
C4 Ir1 C6 63.81(13) . . ? 
C8 Ir1 C6 63.60(13) . . ? 
C16 Ir1 C5 106.14(12) . . ? 
C15 Ir1 C5 133.05(13) . . ? 
C3 Ir1 C5 64.85(12) . . ? 
P1 Ir1 C5 128.07(9) . . ? 
C4 Ir1 C5 35.09(13) . . ? 
C8 Ir1 C5 75.26(12) . . ? 
C6 Ir1 C5 35.48(13) . . ? 
C16 Ir1 C7 126.04(13) . . ? 
C15 Ir1 C7 106.54(13) . . ? 
C3 Ir1 C7 64.86(13) . . ? 
P1 Ir1 C7 137.45(9) . . ? 
C4 Ir1 C7 75.38(13) . . ? 
C8 Ir1 C7 35.28(13) . . ? 
C6 Ir1 C7 35.08(12) . . ? 
C5 Ir1 C7 63.25(12) . . ? 
C12 P1 C1 104.46(16) . . ? 
C12 P1 C9 105.93(16) . . ? 
C1 P1 C9 102.88(16) . . ? 
C12 P1 Ir1 117.51(11) . . ? 
C1 P1 Ir1 104.29(12) . . ? 
C9 P1 Ir1 119.68(12) . . ? 
C2 C1 P1 112.8(2) . . ? 
C2 C1 H1A 111(2) . . ? 
P1 C1 H1A 104(2) . . ? 
C2 C1 H1B 112(2) . . ? 
P1 C1 H1B 109(2) . . ? 
H1A C1 H1B 108(3) . . ? 
C3 C2 C1 111.2(3) . . ? 
C3 C2 H2A 108(2) . . ? 
C1 C2 H2A 109(2) . . ? 
C3 C2 H2B 113(3) . . ? 
C1 C2 H2B 109(3) . . ? 
H2A C2 H2B 107(3) . . ? 
C8 C3 C4 120.0(3) . . ? 
C8 C3 C2 120.4(3) . . ? 
C4 C3 C2 119.5(3) . . ? 
C8 C3 Ir1 75.21(19) . . ? 
C4 C3 Ir1 74.53(18) . . ? 
C2 C3 Ir1 118.7(2) . . ? 
C5 C4 C3 119.5(3) . . ? 
C5 C4 Ir1 74.1(2) . . ? 
C3 C4 Ir1 68.52(18) . . ? 
C5 C4 H4 125(2) . . ? 
C3 C4 H4 116(2) . . ? 
Ir1 C4 H4 125(2) . . ? 
C4 C5 C6 120.1(3) . . ? 
C4 C5 Ir1 70.77(19) . . ? 
C6 C5 Ir1 71.77(19) . . ? 
C4 C5 H5 118(2) . . ? 
C6 C5 H5 122(2) . . ? 
Ir1 C5 H5 128(2) . . ? 
C7 C6 C5 120.4(3) . . ? 
C7 C6 Ir1 73.1(2) . . ? 
C5 C6 Ir1 72.7(2) . . ? 
C7 C6 H6 118(2) . . ? 
C5 C6 H6 121(2) . . ? 
Ir1 C6 H6 127(2) . . ? 
C6 C7 C8 120.3(3) . . ? 
C6 C7 Ir1 71.8(2) . . ? 
C8 C7 Ir1 71.11(19) . . ? 
C6 C7 H7 123(2) . . ? 
C8 C7 H7 116(2) . . ? 
Ir1 C7 H7 127(2) . . ? 
C7 C8 C3 119.2(3) . . ? 
C7 C8 Ir1 73.61(19) . . ? 
C3 C8 Ir1 68.12(17) . . ? 
C7 C8 H8 121(3) . . ? 
C3 C8 H8 119(3) . . ? 
Ir1 C8 H8 127(2) . . ? 
C10 C9 C11 111.6(3) . . ? 
C10 C9 P1 109.7(3) . . ? 
C11 C9 P1 116.8(3) . . ? 
C10 C9 H9 111(2) . . ? 
C11 C9 H9 109(2) . . ? 
P1 C9 H9 99(2) . . ? 
C9 C10 H10A 113(2) . . ? 
C9 C10 H10B 114(3) . . ? 
H10A C10 H10B 107(4) . . ? 
C9 C10 H10C 110(3) . . ? 
H10A C10 H10C 106(3) . . ? 
H10B C10 H10C 106(4) . . ? 
C9 C11 H11A 114(3) . . ? 
C9 C11 H11B 109(2) . . ? 
H11A C11 H11B 108(3) . . ? 
C9 C11 H11C 112(3) . . ? 
H11A C11 H11C 108(4) . . ? 
H11B C11 H11C 105(4) . . ? 
C13 C12 C14 110.7(3) . . ? 
C13 C12 P1 112.6(2) . . ? 
C14 C12 P1 110.7(2) . . ? 
C13 C12 H12 109(2) . . ? 
C14 C12 H12 108(2) . . ? 
P1 C12 H12 106(2) . . ? 
C12 C13 H13A 113(3) . . ? 
C12 C13 H13B 110(2) . . ? 
H13A C13 H13B 108(3) . . ? 
C12 C13 H13C 110(3) . . ? 
H13A C13 H13C 108(4) . . ? 
H13B C13 H13C 106(3) . . ? 
C12 C14 H14A 106(2) . . ? 
C12 C14 H14B 109(2) . . ? 
H14A C14 H14B 110(3) . . ? 
C12 C14 H14C 112(2) . . ? 
H14A C14 H14C 110(3) . . ? 
H14B C14 H14C 109(3) . . ? 
C16 C15 C17 127.6(3) . . ? 
C16 C15 Ir1 69.28(18) . . ? 
C17 C15 Ir1 119.6(2) . . ? 
C16 C15 H15 113(2) . . ? 
C17 C15 H15 110(2) . . ? 
Ir1 C15 H15 111(2) . . ? 
C15 C16 C23 126.7(3) . . ? 
C15 C16 Ir1 70.82(18) . . ? 
C23 C16 Ir1 120.9(2) . . ? 
C15 C16 H16 113(2) . . ? 
C23 C16 H16 110(2) . . ? 
Ir1 C16 H16 109.5(19) . . ? 
C22 C17 C18 118.1(3) . . ? 
C22 C17 C15 124.0(3) . . ? 
C18 C17 C15 117.9(3) . . ? 
C19 C18 C17 120.5(4) . . ? 
C19 C18 H18 121(3) . . ? 
C17 C18 H18 119(3) . . ? 
C20 C19 C18 120.1(4) . . ? 
C20 C19 H19 122(3) . . ? 
C18 C19 H19 118(3) . . ? 
C19 C20 C21 119.9(4) . . ? 
C19 C20 H20 124(3) . . ? 
C21 C20 H20 116(3) . . ? 
C22 C21 C20 120.5(4) . . ? 
C22 C21 H21 116(2) . . ? 
C20 C21 H21 123(2) . . ? 
C21 C22 C17 120.9(4) . . ? 
C21 C22 H22 118(2) . . ? 
C17 C22 H22 121(2) . . ? 
C28 C23 C24 117.9(3) . . ? 
C28 C23 C16 120.2(3) . . ? 
C24 C23 C16 121.2(3) . . ? 
C25 C24 C23 121.1(3) . . ? 
C25 C24 H24 123(2) . . ? 
C23 C24 H24 116(2) . . ? 
C24 C25 C26 119.8(3) . . ? 
C24 C25 H25 117(2) . . ? 
C26 C25 H25 123(2) . . ? 
C27 C26 C25 119.5(3) . . ? 
C27 C26 H26 119(2) . . ? 
C25 C26 H26 121(2) . . ? 
C26 C27 C28 120.5(4) . . ? 
C26 C27 H27 120(2) . . ? 
C28 C27 H27 120(2) . . ? 
C27 C28 C23 121.2(3) . . ? 
C27 C28 H28 118(3) . . ? 
C23 C28 H28 121(2) . . ? 
F2B B1 F1B 109.9(5) . . ? 
F4A B1 F3A 112.3(5) . . ? 
F1B B1 F3A 123.8(5) . . ? 
F2B B1 F3B 127.3(7) . . ? 
F1B B1 F3B 111.0(5) . . ? 
F4A B1 F1A 124.8(6) . . ? 
F3A B1 F1A 110.1(5) . . ? 
F4A B1 F2A 106.6(5) . . ? 
F3A B1 F2A 94.4(5) . . ? 
F1A B1 F2A 103.8(4) . . ? 
F2B B1 F4B 107.7(5) . . ? 
F1B B1 F4B 96.8(5) . . ? 
F3B B1 F4B 98.9(5) . . ? 
 
_diffrn_measured_fraction_theta_max    0.920 
_diffrn_reflns_theta_full              26.00 
_diffrn_measured_fraction_theta_full   0.998 
_refine_diff_density_max    1.203 
_refine_diff_density_min   -0.871 
_refine_diff_density_rms    0.121 

#===END

# Data for compound 16 (local labelling as EDU32AS)

data_compd16
 
_audit_creation_method            SHELXL-97 
_chemical_name_systematic 
; 
 [(eta!1$-C6H4CH2CH2PiPr2-k-P)(H)(NCCH3)3iridium(iii)][BF4]  
; 
_chemical_formula_moiety    'C20 H32 Ir N3 P, B F4'
_chemical_formula_sum       'C20 H32 B F4 Ir N3 P' 
_chemical_formula_weight          624.47 
 
loop_ 
 _atom_type_symbol 
 _atom_type_description 
 _atom_type_scat_dispersion_real 
 _atom_type_scat_dispersion_imag 
 _atom_type_scat_source 
 'C'  'C'   0.0033   0.0016 
 'International Tables Vol C Tables 4.2.6.8 and 6.1.1.4' 
 'H'  'H'   0.0000   0.0000 
 'International Tables Vol C Tables 4.2.6.8 and 6.1.1.4' 
 'B'  'B'   0.0013   0.0007 
 'International Tables Vol C Tables 4.2.6.8 and 6.1.1.4' 
 'N'  'N'   0.0061   0.0033 
 'International Tables Vol C Tables 4.2.6.8 and 6.1.1.4' 
 'F'  'F'   0.0171   0.0103 
 'International Tables Vol C Tables 4.2.6.8 and 6.1.1.4' 
 'P'  'P'   0.1023   0.0942 
 'International Tables Vol C Tables 4.2.6.8 and 6.1.1.4' 
 'Ir'  'Ir'  -1.4442   7.9887 
 'International Tables Vol C Tables 4.2.6.8 and 6.1.1.4' 
 
_symmetry_cell_setting            triclinic 
_symmetry_space_group_name_H-M    P-1 
_symmetry_space_group_name_Hall   '-P 1'

loop_ 
 _symmetry_equiv_pos_as_xyz 
 'x, y, z' 
 '-x, -y, -z' 
 
_cell_length_a                    11.3293(7) 
_cell_length_b                    11.3608(7) 
_cell_length_c                    11.8529(8) 
_cell_angle_alpha                 113.8270(10) 
_cell_angle_beta                  117.5450(10) 
_cell_angle_gamma                 91.5830(10) 
_cell_volume                      1193.34(13) 
_cell_formula_units_Z             2 
_cell_measurement_temperature     100(2) 
_cell_measurement_reflns_used     6125 
_cell_measurement_theta_min       2.178 
_cell_measurement_theta_max       26.806 
 
_exptl_crystal_description        'irregular block' 
_exptl_crystal_colour             'pale yellow' 
_exptl_crystal_size_max           0.237 
_exptl_crystal_size_mid           0.171 
_exptl_crystal_size_min           0.136 
_exptl_crystal_density_diffrn     1.738 
_exptl_crystal_density_method     'not measured' 
_exptl_crystal_F_000              612 
_exptl_absorpt_coefficient_mu     5.704 
_exptl_absorpt_correction_type    multi-scan 
_exptl_absorpt_correction_T_min   0.321 
_exptl_absorpt_correction_T_max   0.460 
_exptl_absorpt_process_details    
; SADABS: Area-Detector Absorption Correction. (1996)  Bruker-AXS 
  within SAINT+ package, v. 6.01.
;  
_diffrn_ambient_temperature       100(2) 
_diffrn_radiation_wavelength      0.71073 
_diffrn_radiation_type            MoK\a 
_diffrn_radiation_source          'normal-focus sealed tube' 
_diffrn_radiation_monochromator   graphite 
_diffrn_measurement_device_type   'Bruker SMART APEX CCD system' 
_diffrn_measurement_method        '\w rotations with narrow frames' 
_diffrn_detector_area_resol_mean  8.26 
_diffrn_standards_decay_%         'no decay' 
_diffrn_reflns_number             14641 
_diffrn_reflns_av_R_equivalents   0.0326 
_diffrn_reflns_av_sigmaI/netI     0.0546 
_diffrn_reflns_limit_h_min        -14 
_diffrn_reflns_limit_h_max        15 
_diffrn_reflns_limit_k_min        -15 
_diffrn_reflns_limit_k_max        15 
_diffrn_reflns_limit_l_min        -15 
_diffrn_reflns_limit_l_max        15 
_diffrn_reflns_theta_min          2.03 
_diffrn_reflns_theta_max          28.49 
_reflns_number_total              5550 
_reflns_number_gt                 4951 
_reflns_threshold_expression      >2sigma(I) 
 
_computing_data_collection        'SMART v. 5.611 (Bruker AXS, 2000)'
_computing_cell_refinement        'SAINT+ v. 6.01 (Bruker AXS, 2000)'
_computing_data_reduction         'SAINT+ v. 6.01 (Bruker AXS, 2000)'
_computing_structure_solution     'SHELXS-97 (Sheldrick, 1990)'
_computing_structure_refinement   'SHELXL-97 (Sheldrick, 1997)'
_computing_molecular_graphics     'XP program, SHELXTL v6.10,Bruker2000'
_computing_publication_material   'XCIF program, SHELXTLv6.10,BrukerAXS'
 
_refine_special_details 
; 
 Refinement of F^2^ against ALL reflections.  The weighted R-factor wR and 
 goodness of fit S are based on F^2^, conventional R-factors R are based 
 on F, with F set to zero for negative F^2^. The threshold expression of 
 F^2^ > 2sigma(F^2^) is used only for calculating R-factors(gt) etc. and is 
 not relevant to the choice of reflections for refinement.  R-factors based 
 on F^2^ are statistically about twice as large as those based on F, and R- 
 factors based on ALL data will be even larger.

 All hydrogen were included in the refinement from observed positions
 and refined with free positional and thermal parameters. The highest 
 four peaks about 1 e/\%A^3^ were situated close to the iridium atom. 
; 
 
_refine_ls_structure_factor_coef  Fsqd  
_refine_ls_matrix_type            full 
_refine_ls_weighting_scheme       calc  
_refine_ls_weighting_details 
 'calc w=1/[\s^2^(Fo^2^)+(0.0135P)^2^+0.0000P] where P=(Fo^2^+2Fc^2^)/3' 
_atom_sites_solution_primary      direct 
_atom_sites_solution_secondary    difmap 
_atom_sites_solution_hydrogens    difmap 
_refine_ls_hydrogen_treatment     refall 
_refine_ls_extinction_method      none 
_refine_ls_number_reflns          5550 
_refine_ls_number_parameters      399 
_refine_ls_number_restraints      0 
_refine_ls_R_factor_all           0.0315 
_refine_ls_R_factor_gt            0.0274 
_refine_ls_wR_factor_ref          0.0502 
_refine_ls_wR_factor_gt           0.0494 
_refine_ls_goodness_of_fit_ref    1.004 
_refine_ls_restrained_S_all       1.004 
_refine_ls_shift/su_max           0.011 
_refine_ls_shift/su_mean          0.000 
 
loop_ 
 _atom_site_label 
 _atom_site_type_symbol 
 _atom_site_fract_x 
 _atom_site_fract_y 
 _atom_site_fract_z 
 _atom_site_U_iso_or_equiv 
 _atom_site_adp_type 
 _atom_site_occupancy 
 _atom_site_symmetry_multiplicity 
 _atom_site_calc_flag 
 _atom_site_refinement_flags 
 _atom_site_disorder_assembly 
 _atom_site_disorder_group 
Ir1 Ir 0.212023(15) 0.380964(15) 0.504568(16) 0.01880(5) Uani 1 1 d . . . 
H1 H 0.098(4) 0.450(4) 0.491(4) 0.051(13) Uiso 1 1 d . . . 
P1 P 0.18963(10) 0.33355(10) 0.65997(11) 0.0209(2) Uani 1 1 d . . . 
N1 N 0.2141(3) 0.4334(3) 0.3555(3) 0.0234(7) Uani 1 1 d . . . 
N2 N 0.3726(3) 0.2882(3) 0.4959(3) 0.0227(7) Uani 1 1 d . . . 
N3 N 0.0722(3) 0.2032(3) 0.3215(3) 0.0229(7) Uani 1 1 d . . . 
C1 C 0.1886(5) 0.4806(4) 0.8021(5) 0.0251(9) Uani 1 1 d . . . 
H1A H 0.258(4) 0.496(4) 0.890(4) 0.030(12) Uiso 1 1 d . . . 
H1B H 0.105(4) 0.453(3) 0.800(4) 0.022(10) Uiso 1 1 d . . . 
C2 C 0.1919(4) 0.6049(4) 0.7837(5) 0.0236(9) Uani 1 1 d . . . 
H2A H 0.110(4) 0.589(3) 0.695(4) 0.021(10) Uiso 1 1 d . . . 
H2B H 0.188(4) 0.671(4) 0.860(4) 0.023(10) Uiso 1 1 d . . . 
C3 C 0.3177(4) 0.6460(4) 0.7801(4) 0.0205(8) Uani 1 1 d . . . 
C4 C 0.3421(4) 0.5609(4) 0.6732(4) 0.0203(8) Uani 1 1 d . . . 
C5 C 0.4654(4) 0.6086(4) 0.6840(5) 0.0275(10) Uani 1 1 d . . . 
H5 H 0.481(4) 0.557(4) 0.610(5) 0.047(14) Uiso 1 1 d . . . 
C6 C 0.5557(4) 0.7329(4) 0.7919(5) 0.0330(11) Uani 1 1 d . . . 
H6 H 0.635(4) 0.758(4) 0.793(4) 0.045(13) Uiso 1 1 d . . . 
C7 C 0.5265(4) 0.8156(4) 0.8927(5) 0.0337(11) Uani 1 1 d . . . 
H7 H 0.585(4) 0.895(4) 0.957(4) 0.029(11) Uiso 1 1 d . . . 
C8 C 0.4082(4) 0.7707(4) 0.8862(4) 0.0253(9) Uani 1 1 d . . . 
H8 H 0.388(3) 0.822(3) 0.954(4) 0.017(10) Uiso 1 1 d . . . 
C9 C 0.3250(4) 0.2693(4) 0.7610(4) 0.0277(10) Uani 1 1 d . . . 
H9 H 0.312(3) 0.276(3) 0.839(4) 0.014(9) Uiso 1 1 d . . . 
C10 C 0.4678(4) 0.3573(5) 0.8307(5) 0.0291(10) Uani 1 1 d . . . 
H10A H 0.482(3) 0.451(4) 0.885(4) 0.015(10) Uiso 1 1 d . . . 
H10B H 0.494(3) 0.347(3) 0.765(4) 0.017(10) Uiso 1 1 d . . . 
H10C H 0.535(4) 0.334(4) 0.900(4) 0.033(12) Uiso 1 1 d . . . 
C11 C 0.3133(5) 0.1240(5) 0.6696(5) 0.0337(11) Uani 1 1 d . . . 
H11A H 0.314(4) 0.115(3) 0.583(4) 0.026(11) Uiso 1 1 d . . . 
H11B H 0.386(4) 0.094(4) 0.722(4) 0.036(12) Uiso 1 1 d . . . 
H11C H 0.230(5) 0.061(4) 0.640(5) 0.050(14) Uiso 1 1 d . . . 
C12 C 0.0270(4) 0.2106(4) 0.5780(4) 0.0252(9) Uani 1 1 d . . . 
H12 H 0.027(4) 0.130(4) 0.502(4) 0.026(11) Uiso 1 1 d . . . 
C13 C -0.0978(5) 0.2554(5) 0.5008(6) 0.0337(11) Uani 1 1 d . . . 
H13A H -0.106(4) 0.276(4) 0.428(4) 0.025(11) Uiso 1 1 d . . . 
H13B H -0.101(4) 0.333(4) 0.557(4) 0.032(13) Uiso 1 1 d . . . 
H13C H -0.179(4) 0.185(4) 0.456(4) 0.026(11) Uiso 1 1 d . . . 
C14 C 0.0148(6) 0.1751(5) 0.6836(6) 0.0372(12) Uani 1 1 d . . . 
H14A H 0.022(4) 0.248(4) 0.761(4) 0.028(12) Uiso 1 1 d . . . 
H14B H -0.073(4) 0.108(4) 0.634(4) 0.028(11) Uiso 1 1 d . . . 
H14C H 0.085(5) 0.142(4) 0.726(5) 0.051(16) Uiso 1 1 d . . . 
C15 C -0.0049(4) 0.1108(4) 0.2181(4) 0.0249(9) Uani 1 1 d . . . 
C16 C -0.1055(5) -0.0062(5) 0.0855(5) 0.0404(12) Uani 1 1 d . . . 
H16A H -0.172(4) -0.041(4) 0.102(4) 0.035(12) Uiso 1 1 d . . . 
H16B H -0.156(5) 0.013(5) 0.009(5) 0.068(17) Uiso 1 1 d . . . 
H16C H -0.063(5) -0.077(5) 0.062(5) 0.052(15) Uiso 1 1 d . . . 
C17 C 0.2021(4) 0.4456(4) 0.2607(5) 0.0276(9) Uani 1 1 d . . . 
C18 C 0.1864(6) 0.4563(6) 0.1363(6) 0.0451(13) Uani 1 1 d . . . 
H18A H 0.193(4) 0.544(4) 0.155(4) 0.027(12) Uiso 1 1 d . . . 
H18B H 0.258(5) 0.436(4) 0.124(5) 0.048(16) Uiso 1 1 d . . . 
H18C H 0.097(5) 0.396(5) 0.052(5) 0.059(16) Uiso 1 1 d . . . 
C19 C 0.4455(4) 0.2287(4) 0.4763(4) 0.0254(9) Uani 1 1 d . . . 
C20 C 0.5402(6) 0.1511(6) 0.4536(7) 0.0410(13) Uani 1 1 d . . . 
H20A H 0.493(5) 0.086(5) 0.365(5) 0.058(17) Uiso 1 1 d . . . 
H20B H 0.580(6) 0.202(6) 0.430(6) 0.09(2) Uiso 1 1 d . . . 
H20C H 0.597(4) 0.143(4) 0.527(5) 0.036(14) Uiso 1 1 d . . . 
B1 B 0.7817(6) 0.1533(5) 0.8325(6) 0.0350(12) Uani 1 1 d . . . 
F1 F 0.9123(3) 0.2080(3) 0.9527(3) 0.0685(9) Uani 1 1 d . . . 
F2 F 0.7407(4) 0.2461(3) 0.7904(4) 0.0949(12) Uani 1 1 d . . . 
F3 F 0.7788(3) 0.0458(3) 0.7236(3) 0.0595(8) Uani 1 1 d . . . 
F4 F 0.6920(3) 0.1126(3) 0.8663(3) 0.0614(8) Uani 1 1 d . . . 
 
loop_ 
 _atom_site_aniso_label 
 _atom_site_aniso_U_11 
 _atom_site_aniso_U_22 
 _atom_site_aniso_U_33 
 _atom_site_aniso_U_23 
 _atom_site_aniso_U_13 
 _atom_site_aniso_U_12 
Ir1 0.01602(8) 0.02104(8) 0.01889(8) 0.00876(6) 0.00921(6) 0.00551(6) 
P1 0.0194(5) 0.0223(5) 0.0229(5) 0.0104(5) 0.0123(4) 0.0070(4) 
N1 0.0239(18) 0.0204(18) 0.0248(19) 0.0084(15) 0.0137(15) 0.0048(14) 
N2 0.0201(17) 0.0235(18) 0.0242(18) 0.0110(15) 0.0115(15) 0.0055(14) 
N3 0.0209(17) 0.0239(18) 0.0267(19) 0.0119(16) 0.0143(15) 0.0081(15) 
C1 0.025(2) 0.029(2) 0.025(2) 0.011(2) 0.0163(19) 0.0078(19) 
C2 0.022(2) 0.025(2) 0.022(2) 0.0078(19) 0.0123(18) 0.0080(18) 
C3 0.021(2) 0.022(2) 0.023(2) 0.0141(18) 0.0112(17) 0.0080(16) 
C4 0.023(2) 0.020(2) 0.022(2) 0.0128(17) 0.0119(17) 0.0076(16) 
C5 0.029(2) 0.030(2) 0.028(2) 0.013(2) 0.019(2) 0.0070(19) 
C6 0.026(2) 0.034(3) 0.036(3) 0.011(2) 0.019(2) 0.000(2) 
C7 0.028(2) 0.027(3) 0.028(2) 0.004(2) 0.010(2) -0.006(2) 
C8 0.029(2) 0.025(2) 0.023(2) 0.0098(19) 0.0162(19) 0.0086(18) 
C9 0.033(2) 0.031(2) 0.024(2) 0.016(2) 0.0145(19) 0.0111(19) 
C10 0.025(2) 0.035(3) 0.021(2) 0.010(2) 0.0100(19) 0.013(2) 
C11 0.035(3) 0.031(3) 0.035(3) 0.018(2) 0.015(2) 0.016(2) 
C12 0.024(2) 0.023(2) 0.033(2) 0.012(2) 0.0196(19) 0.0043(18) 
C13 0.023(2) 0.027(3) 0.049(3) 0.015(3) 0.020(2) 0.005(2) 
C14 0.044(3) 0.032(3) 0.042(3) 0.016(3) 0.029(3) 0.004(2) 
C15 0.020(2) 0.026(2) 0.029(2) 0.014(2) 0.0128(18) 0.0082(18) 
C16 0.034(3) 0.035(3) 0.032(3) 0.012(2) 0.007(2) -0.002(2) 
C17 0.028(2) 0.022(2) 0.032(2) 0.012(2) 0.017(2) 0.0073(18) 
C18 0.055(4) 0.047(4) 0.041(3) 0.026(3) 0.026(3) 0.008(3) 
C19 0.023(2) 0.025(2) 0.027(2) 0.0102(19) 0.0135(19) 0.0046(18) 
C20 0.038(3) 0.048(3) 0.047(4) 0.020(3) 0.030(3) 0.024(3) 
B1 0.038(3) 0.034(3) 0.037(3) 0.017(3) 0.021(3) 0.015(2) 
F1 0.0349(17) 0.088(2) 0.055(2) 0.0165(18) 0.0187(15) -0.0004(16) 
F2 0.128(3) 0.061(2) 0.102(3) 0.056(2) 0.048(3) 0.045(2) 
F3 0.0584(19) 0.0408(17) 0.072(2) 0.0012(15) 0.0507(17) 0.0009(14) 
F4 0.0411(17) 0.094(2) 0.0461(18) 0.0229(17) 0.0292(15) 0.0072(16) 
 
_geom_special_details 
; 
 All esds (except the esd in the dihedral angle between two l.s. planes) 
 are estimated using the full covariance matrix.  The cell esds are taken 
 into account individually in the estimation of esds in distances, angles 
 and torsion angles; correlations between esds in cell parameters are only 
 used when they are defined by crystal symmetry.  An approximate (isotropic) 
 treatment of cell esds is used for estimating esds involving l.s. planes. 
; 
 
loop_ 
 _geom_bond_atom_site_label_1 
 _geom_bond_atom_site_label_2 
 _geom_bond_distance 
 _geom_bond_site_symmetry_2 
 _geom_bond_publ_flag 
Ir1 C4 2.038(4) . ? 
Ir1 N1 2.090(3) . ? 
Ir1 N3 2.098(3) . ? 
Ir1 N2 2.150(3) . ? 
Ir1 P1 2.2302(10) . ? 
Ir1 H1 1.51(4) . ? 
P1 C1 1.837(4) . ? 
P1 C9 1.840(4) . ? 
P1 C12 1.843(4) . ? 
N1 C17 1.134(5) . ? 
N2 C19 1.129(5) . ? 
N3 C15 1.134(5) . ? 
C1 C2 1.515(5) . ? 
C1 H1A 0.91(4) . ? 
C1 H1B 0.97(4) . ? 
C2 C3 1.512(5) . ? 
C2 H2A 0.97(3) . ? 
C2 H2B 0.93(4) . ? 
C3 C8 1.388(5) . ? 
C3 C4 1.401(5) . ? 
C4 C5 1.414(5) . ? 
C5 C6 1.389(6) . ? 
C5 H5 0.93(4) . ? 
C6 C7 1.377(6) . ? 
C6 H6 0.92(4) . ? 
C7 C8 1.377(6) . ? 
C7 H7 0.89(4) . ? 
C8 H8 0.92(3) . ? 
C9 C10 1.519(6) . ? 
C9 C11 1.526(6) . ? 
C9 H9 0.98(3) . ? 
C10 H10A 0.95(3) . ? 
C10 H10B 0.91(4) . ? 
C10 H10C 0.97(4) . ? 
C11 H11A 1.00(4) . ? 
C11 H11B 0.95(4) . ? 
C11 H11C 0.99(4) . ? 
C12 C13 1.521(6) . ? 
C12 C14 1.521(6) . ? 
C12 H12 0.99(4) . ? 
C13 H13A 0.94(4) . ? 
C13 H13B 0.88(4) . ? 
C13 H13C 0.97(4) . ? 
C14 H14A 0.92(4) . ? 
C14 H14B 0.98(4) . ? 
C14 H14C 0.90(4) . ? 
C15 C16 1.452(6) . ? 
C16 H16A 0.97(4) . ? 
C16 H16B 0.94(5) . ? 
C16 H16C 0.96(5) . ? 
C17 C18 1.458(6) . ? 
C18 H18A 0.92(4) . ? 
C18 H18B 0.91(4) . ? 
C18 H18C 0.98(5) . ? 
C19 C20 1.458(6) . ? 
C20 H20A 0.87(5) . ? 
C20 H20B 0.92(6) . ? 
C20 H20C 0.85(4) . ? 
B1 F2 1.347(6) . ? 
B1 F3 1.358(6) . ? 
B1 F1 1.374(6) . ? 
B1 F4 1.381(6) . ? 
 
loop_ 
 _geom_angle_atom_site_label_1 
 _geom_angle_atom_site_label_2 
 _geom_angle_atom_site_label_3 
 _geom_angle 
 _geom_angle_site_symmetry_1 
 _geom_angle_site_symmetry_3 
 _geom_angle_publ_flag 
C4 Ir1 N1 91.96(13) . . ? 
C4 Ir1 N3 175.66(13) . . ? 
N1 Ir1 N3 84.34(12) . . ? 
C4 Ir1 N2 95.44(13) . . ? 
N1 Ir1 N2 85.81(12) . . ? 
N3 Ir1 N2 86.57(12) . . ? 
C4 Ir1 P1 88.27(10) . . ? 
N1 Ir1 P1 173.76(9) . . ? 
N3 Ir1 P1 95.16(9) . . ? 
N2 Ir1 P1 100.38(9) . . ? 
C4 Ir1 H1 85.9(15) . . ? 
N1 Ir1 H1 84.8(15) . . ? 
N3 Ir1 H1 91.5(15) . . ? 
N2 Ir1 H1 170.5(15) . . ? 
P1 Ir1 H1 89.0(15) . . ? 
C1 P1 C9 103.5(2) . . ? 
C1 P1 C12 104.16(19) . . ? 
C9 P1 C12 104.50(19) . . ? 
C1 P1 Ir1 112.19(14) . . ? 
C9 P1 Ir1 117.05(14) . . ? 
C12 P1 Ir1 114.07(14) . . ? 
C17 N1 Ir1 170.6(3) . . ? 
C19 N2 Ir1 172.2(3) . . ? 
C15 N3 Ir1 176.2(3) . . ? 
C2 C1 P1 114.3(3) . . ? 
C2 C1 H1A 111(2) . . ? 
P1 C1 H1A 110(2) . . ? 
C2 C1 H1B 112(2) . . ? 
P1 C1 H1B 105(2) . . ? 
H1A C1 H1B 104(3) . . ? 
C3 C2 C1 112.5(3) . . ? 
C3 C2 H2A 109(2) . . ? 
C1 C2 H2A 110(2) . . ? 
C3 C2 H2B 112(2) . . ? 
C1 C2 H2B 106(2) . . ? 
H2A C2 H2B 108(3) . . ? 
C8 C3 C4 121.2(4) . . ? 
C8 C3 C2 117.8(4) . . ? 
C4 C3 C2 121.0(3) . . ? 
C3 C4 C5 115.8(3) . . ? 
C3 C4 Ir1 125.1(3) . . ? 
C5 C4 Ir1 119.1(3) . . ? 
C6 C5 C4 122.3(4) . . ? 
C6 C5 H5 120(3) . . ? 
C4 C5 H5 118(3) . . ? 
C7 C6 C5 120.3(4) . . ? 
C7 C6 H6 122(3) . . ? 
C5 C6 H6 118(3) . . ? 
C8 C7 C6 118.6(4) . . ? 
C8 C7 H7 124(3) . . ? 
C6 C7 H7 117(3) . . ? 
C7 C8 C3 121.8(4) . . ? 
C7 C8 H8 120(2) . . ? 
C3 C8 H8 118(2) . . ? 
C10 C9 C11 111.0(4) . . ? 
C10 C9 P1 111.2(3) . . ? 
C11 C9 P1 112.9(3) . . ? 
C10 C9 H9 107(2) . . ? 
C11 C9 H9 109(2) . . ? 
P1 C9 H9 106(2) . . ? 
C9 C10 H10A 116(2) . . ? 
C9 C10 H10B 113(2) . . ? 
H10A C10 H10B 107(3) . . ? 
C9 C10 H10C 110(2) . . ? 
H10A C10 H10C 104(3) . . ? 
H10B C10 H10C 107(3) . . ? 
C9 C11 H11A 109(2) . . ? 
C9 C11 H11B 112(2) . . ? 
H11A C11 H11B 110(3) . . ? 
C9 C11 H11C 113(3) . . ? 
H11A C11 H11C 110(3) . . ? 
H11B C11 H11C 103(3) . . ? 
C13 C12 C14 110.7(4) . . ? 
C13 C12 P1 111.4(3) . . ? 
C14 C12 P1 113.7(3) . . ? 
C13 C12 H12 106(2) . . ? 
C14 C12 H12 110(2) . . ? 
P1 C12 H12 105(2) . . ? 
C12 C13 H13A 119(2) . . ? 
C12 C13 H13B 114(3) . . ? 
H13A C13 H13B 97(3) . . ? 
C12 C13 H13C 107(2) . . ? 
H13A C13 H13C 106(3) . . ? 
H13B C13 H13C 113(3) . . ? 
C12 C14 H14A 113(2) . . ? 
C12 C14 H14B 111(2) . . ? 
H14A C14 H14B 110(3) . . ? 
C12 C14 H14C 112(3) . . ? 
H14A C14 H14C 103(4) . . ? 
H14B C14 H14C 108(4) . . ? 
N3 C15 C16 179.0(5) . . ? 
C15 C16 H16A 108(2) . . ? 
C15 C16 H16B 113(3) . . ? 
H16A C16 H16B 107(4) . . ? 
C15 C16 H16C 111(3) . . ? 
H16A C16 H16C 104(4) . . ? 
H16B C16 H16C 113(4) . . ? 
N1 C17 C18 178.0(5) . . ? 
C17 C18 H18A 109(2) . . ? 
C17 C18 H18B 110(3) . . ? 
H18A C18 H18B 105(4) . . ? 
C17 C18 H18C 108(3) . . ? 
H18A C18 H18C 112(4) . . ? 
H18B C18 H18C 113(4) . . ? 
N2 C19 C20 178.8(5) . . ? 
C19 C20 H20A 107(3) . . ? 
C19 C20 H20B 99(4) . . ? 
H20A C20 H20B 93(4) . . ? 
C19 C20 H20C 114(3) . . ? 
H20A C20 H20C 125(4) . . ? 
H20B C20 H20C 115(5) . . ? 
F2 B1 F3 109.9(4) . . ? 
F2 B1 F1 109.3(4) . . ? 
F3 B1 F1 110.8(4) . . ? 
F2 B1 F4 109.0(4) . . ? 
F3 B1 F4 108.6(4) . . ? 
F1 B1 F4 109.2(4) . . ? 
 
_diffrn_measured_fraction_theta_max    0.920 
_diffrn_reflns_theta_full              26.00 
_diffrn_measured_fraction_theta_full   0.996 
_refine_diff_density_max    1.834 
_refine_diff_density_min   -1.017 
_refine_diff_density_rms    0.126 

#===END
